# Supplementary material for: Replicate Studies Separated by 40 Years Reveal Changes in the Altitudinal Stratification of Montane Passalid Beetle Species (Passalidae) in Mesoamerica
Source: MDPI journal article supplement (doi:10.3390/d15030315), 2023-02-21
Supplement: s1 [file s1]

### Linear regression Results.

#### 1) Average Daily Temperature

Call: lm(formula = Year ~ MeanTemp)

Residuals:

| Min     | 1Q     | Median | 3Q    | Max    |
|---------|--------|--------|-------|--------|
| -22.044 | -8.252 | 2.119  | 8.321 | 14.709 |

Coefficients:

|             | Estimate | Std. Error | t value | Pr(> t )     |
|-------------|----------|------------|---------|--------------|
| (Intercept) | 1400.988 | 182.460    | 7.678   | 2.56e-09 *** |
| MeanTemp    | 21.910   | 6.685      | 3.278   | 0.0022 **    |

Signif. codes:

0 '\*\*\*' 0.001 '\*\*' 0.01 '\*' 0.05 '.' 0.1 ' ' 1

Residual standard error: 10.74 on 39 degrees of freedom

Multiple R-squared: 0.216, Adjusted R-squared: 0.1959

F-statistic: 10.74 on 1 and 39 DF, p-value: 0.002205

#### 2) Precipitation

Call: lm(formula = Year ~ MeanPrec)

Residuals:

| Min      | 1Q      | Median  | 3Q     | Max     |
|----------|---------|---------|--------|---------|
| -19.7002 | -7.4564 | -0.4325 | 8.4704 | 19.3332 |

Coefficients:

|             | Estimate | Std. Error | t value | Pr(> t )   |
|-------------|----------|------------|---------|------------|
| (Intercept) | 1978.872 | 12.442     | 159.047 | <2e-16 *** |
| MeanPrec    | 2.075    | 1.239      | 1.675   | 0.103      |

Signif. codes: 0 '\*\*\*' 0.001 '\*\*' 0.01 '\*' 0.05 '.' 0.1 ' ' 1

Residual standard error: 10.85 on 36 degrees of freedom (1 observation deleted due to missingness)

Multiple R-squared: 0.07228, Adjusted R-squared: 0.04651

F-statistic: 2.805 on 1 and 36 DF, p-value: 0.1026

#### 3) Evapotranspiration

Call: lm(formula = Year ~ MeanEvap)

Residuals:

| Min     | 1Q      | Median | 3Q    | Max    |
|---------|---------|--------|-------|--------|
| -24.217 | -11.981 | -0.965 | 7.187 | 35.388 |

Coefficients:

|             | Estimate | Std. Error | t value | Pr(> t )    |
|-------------|----------|------------|---------|-------------|
| (Intercept) | 1782.38  | 58.84      | 30.292  | < 2e-16 *** |
| MeanEvap    | 53.78    | 15.38      | 3.497   | 0.00094 *** |

---

Signif. codes: 0 '\*\*\*' 0.001 '\*\*' 0.01 '\*' 0.05 '.' 0.1 ' ' 1

Residual standard error: 15.15 on 55 degrees of freedom (3 observations deleted due to missingness)

Multiple R-squared: 0.1819, Adjusted R-squared: 0.167

F-statistic: 12.23 on 1 and 55 DF, p-value: 0.0009402
